# Supplementary material for: Novel recurrent chromosomal aberrations detected in clonal plasma cells of light chain amyloidosis patients show potential adverse prognostic effect: first results from a genome-wide copy number array analysis
Source: PubMed Central journal article supplement — Haematologica. 2017 Mar 24;102(7):1281–90. doi: 10.3324/haematol.2016.160721 (PMC5566044; doi:10.3324/haematol.2016.160721), 2017-07
Supplement: 2016_160721-Disclosures_and_Contributions.pdf [file 2016_160721-Disclosures_and_Contributions.pdf]

Haematologica  
HAEMATOL/2016/160721  
Version 3

Novel recurrent chromosomal aberrations detected in clonal plasma cells of light chain amyloidosis patients show potential adverse prognostic effect: first results from a genome-wide copy number array analysis

Martin Granzow, Ute Hegenbart, Katrin Hinderhofer, Dirk Hose, Anja Seckinger, Tilmann Bochtler, Kari Hemminki, Hartmut Goldschmidt, Stefan O Schönland, and Anna Jauch

Disclosures: This work was supported by the Federal Ministry of Education (BMBF) in context of the German AL Amyloidosis Consortium GERAMY to UH, SOS, KH, and AJ (grant 01GM1107), the German Federal Ministry of Education (BMBF) within the framework of the e:Med research and funding concept "CLIOMMICS" (01ZX1309) and "CAMPSIMM" (01ES1103) to DH, AS, HG, and the Deutsche Forschungsgemeinschaft (SFB/TRR79) to DH, AS, HG. Conflict of Interest: H.G: declares the following conflict of interests: Research Support (Institutions): Celgene, Janssen, Chugai, Novartis, BMS; Advisory Boards (Institutions): Janssen, Celgene, Novartis, Amgen Takeda, BMS; Honoraria: Celgene, Janssen, Novartis, Chugai, BMS. All other authors declare there is no competing financial interest in relation to the work described here.

Contributions: M.G., A.J., and S.O.S. designed the study; D.H. and A.S. performed plasma cell purification; A.J. undertook cytogenetic analysis; M.G., A.J., and K.H. performed array-CGH analysis.; U.H., H.G., and S.O.S. included patients as investigators.; M.G., U.H, K.H., A.S., D.H., T.B., S.O.S., and A.J. collected data; M.G. performed statistical analysis; M.G., A.S., D.H., T.B., K.H., S.O.S., and A.J. interpreted data; M.G., T.B., S.O.S., and A.J. wrote the manuscript; all authors revised and approved the manuscript.
